# Supplementary material
Source: PubMed Central journal article supplement (PMC2151696)

**Supplemental Fig. 1 Expression profiles of various flowering regulators in *osmads51-2* of 55 DAG *OsMADS51* mutants**

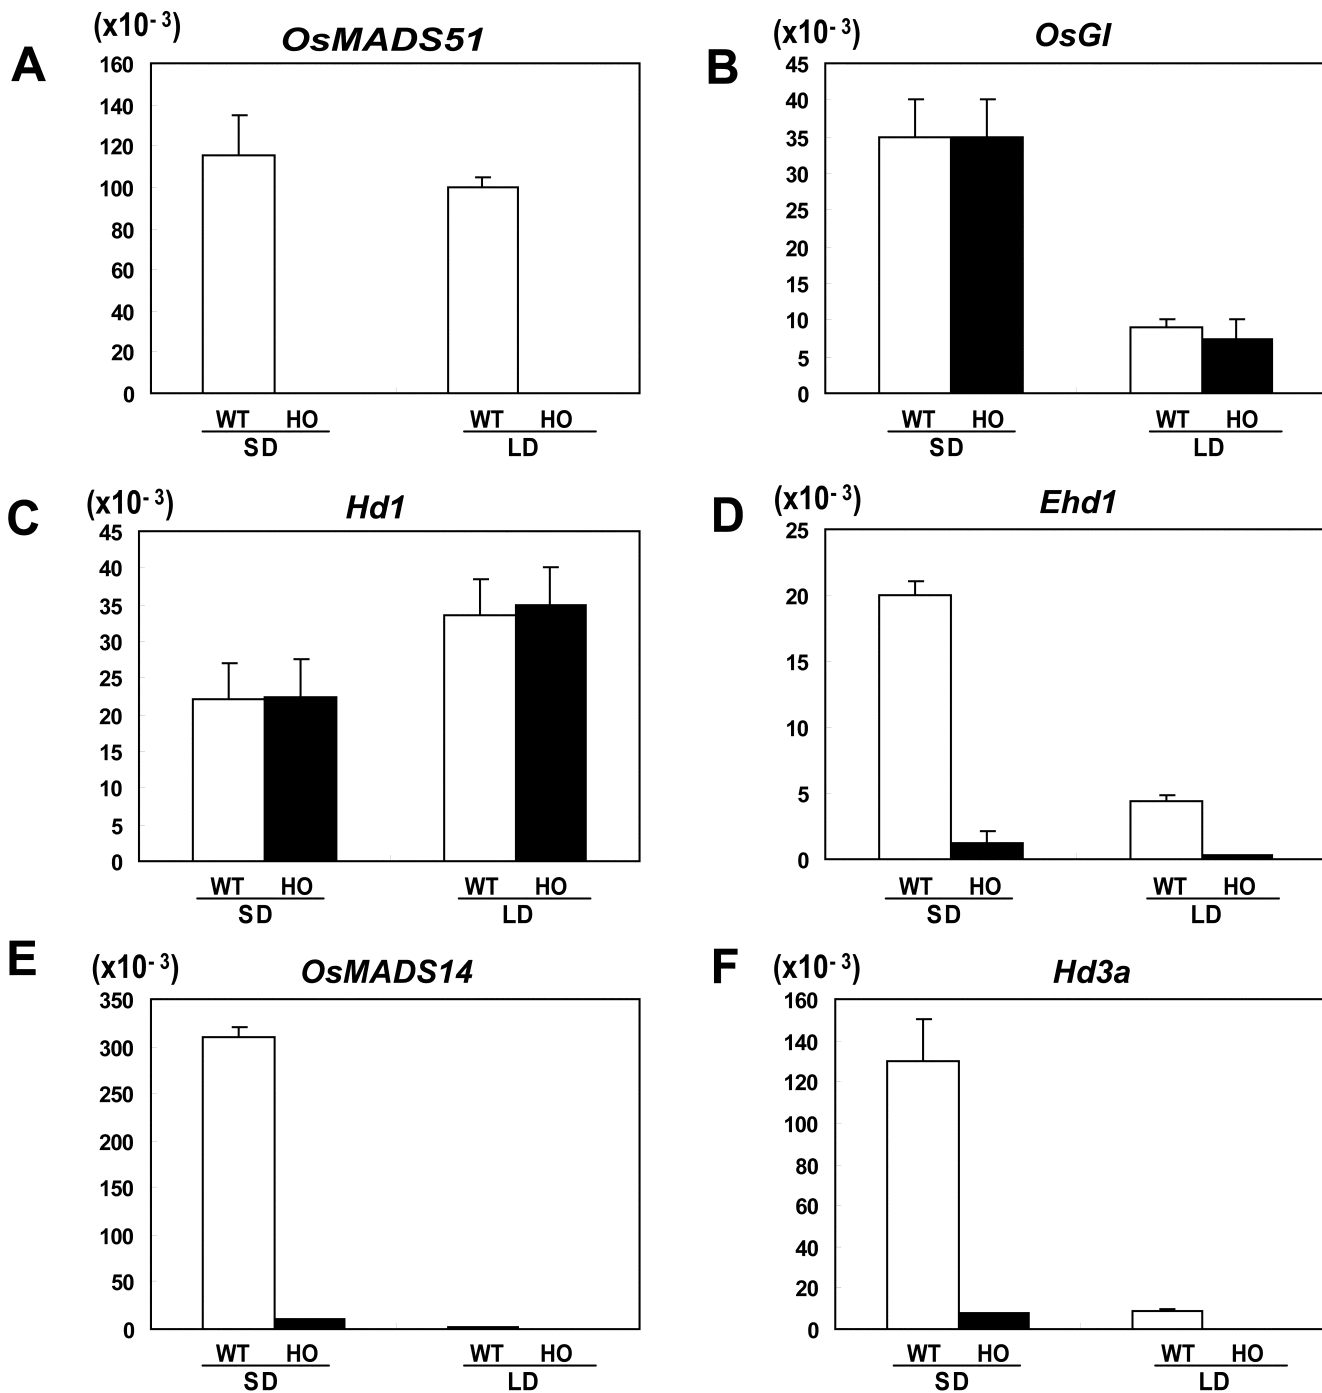

Supplement: plntphys_pp.107.103291_1.pdf [file plntphys_pp.107.103291_1.pdf]
