# Supplementary material
Source: PubMed Central journal article supplement (PMC2151696)

**Supplemental Fig. 2 Expression profiles of various flowering regulators in line #4 of 35 DAG *ubi::OsMADS51* transgenic plants**

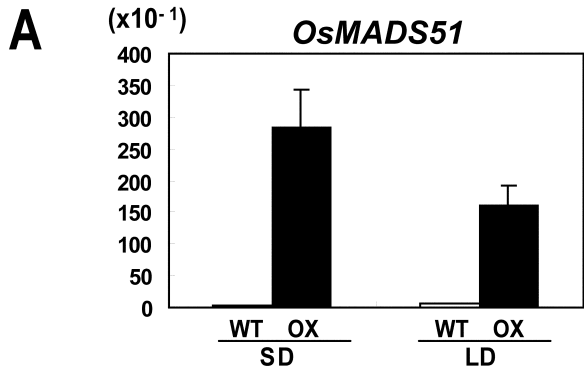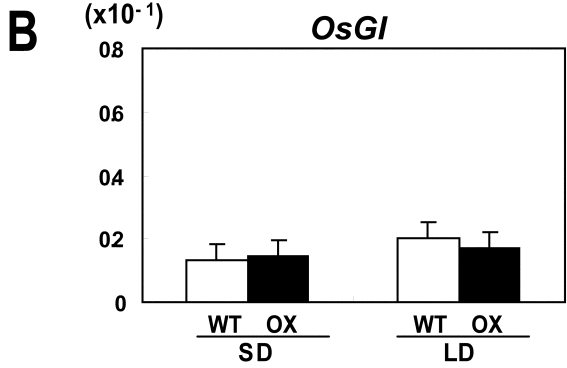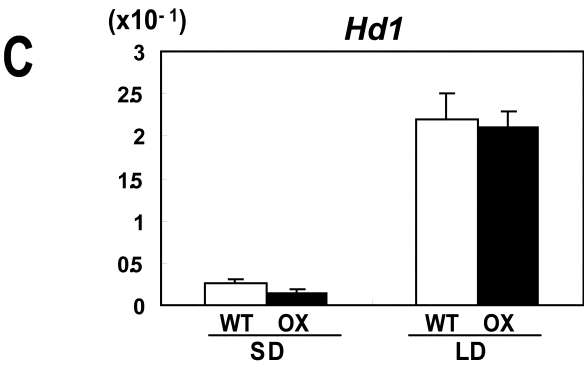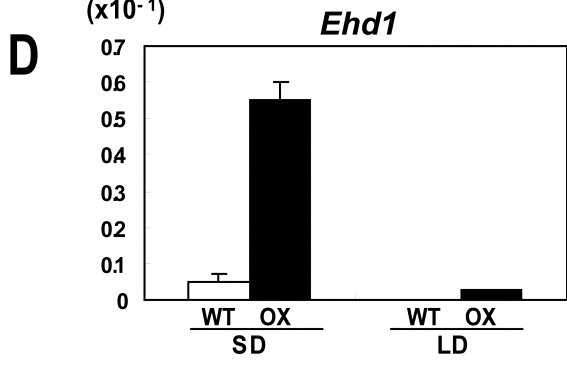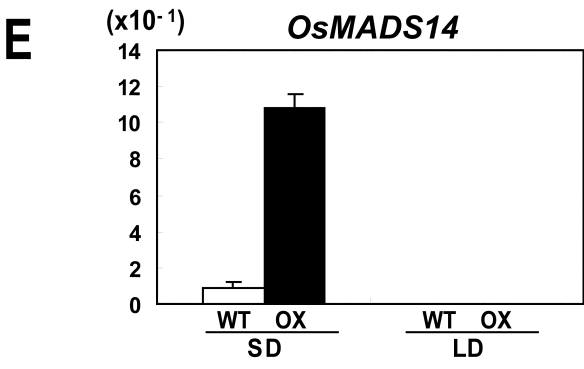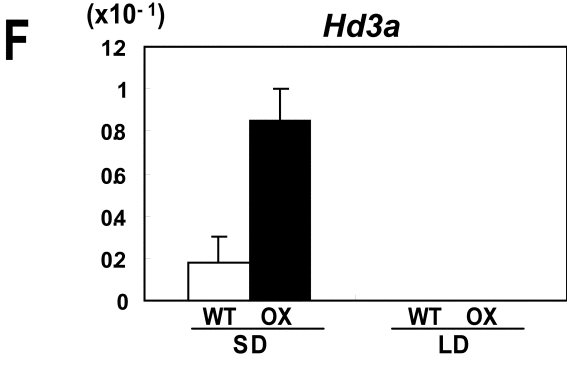

Supplement: plntphys_pp.107.103291_2.pdf [file plntphys_pp.107.103291_2.pdf]
