# Supplementary material
Source: PubMed Central journal article supplement (PMC2151696)

# Supplemental Fig. 3 Analysis of the relationship between *OsMADS50* and *OsMADS51*

**A**

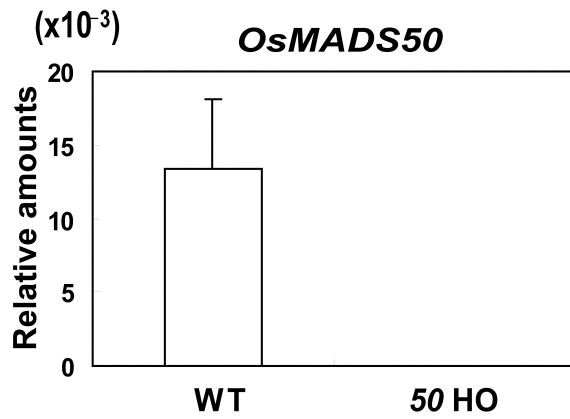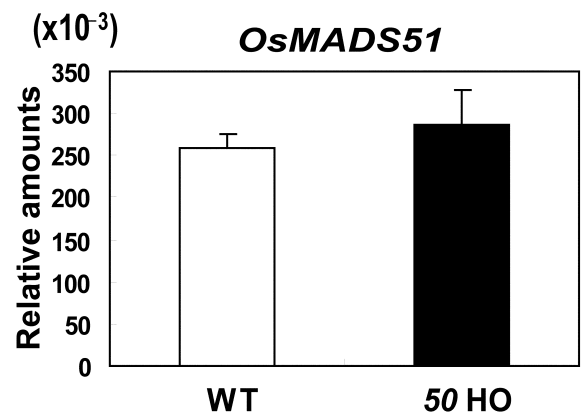

**B**

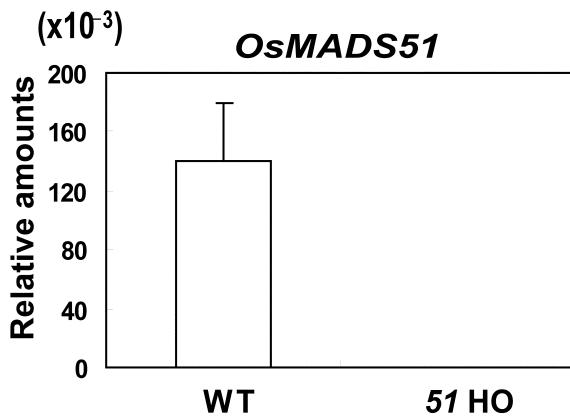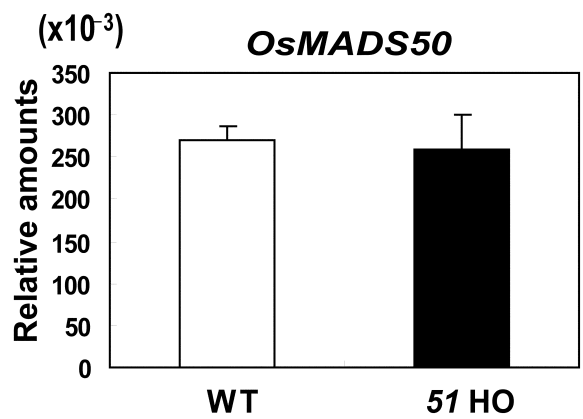

Supplement: plntphys_pp.107.103291_3.pdf [file plntphys_pp.107.103291_3.pdf]
